# Supplementary material
Source: Research Square preprint supplement (doi:10.21203/rs.3.rs-7760707/v1)
Supplement: Supplementary file 1 [file 91dd5a0dfb16903b4c49bc1c.docx]

Supplementary File

Figures S1 to S4

Tables S1 to S4


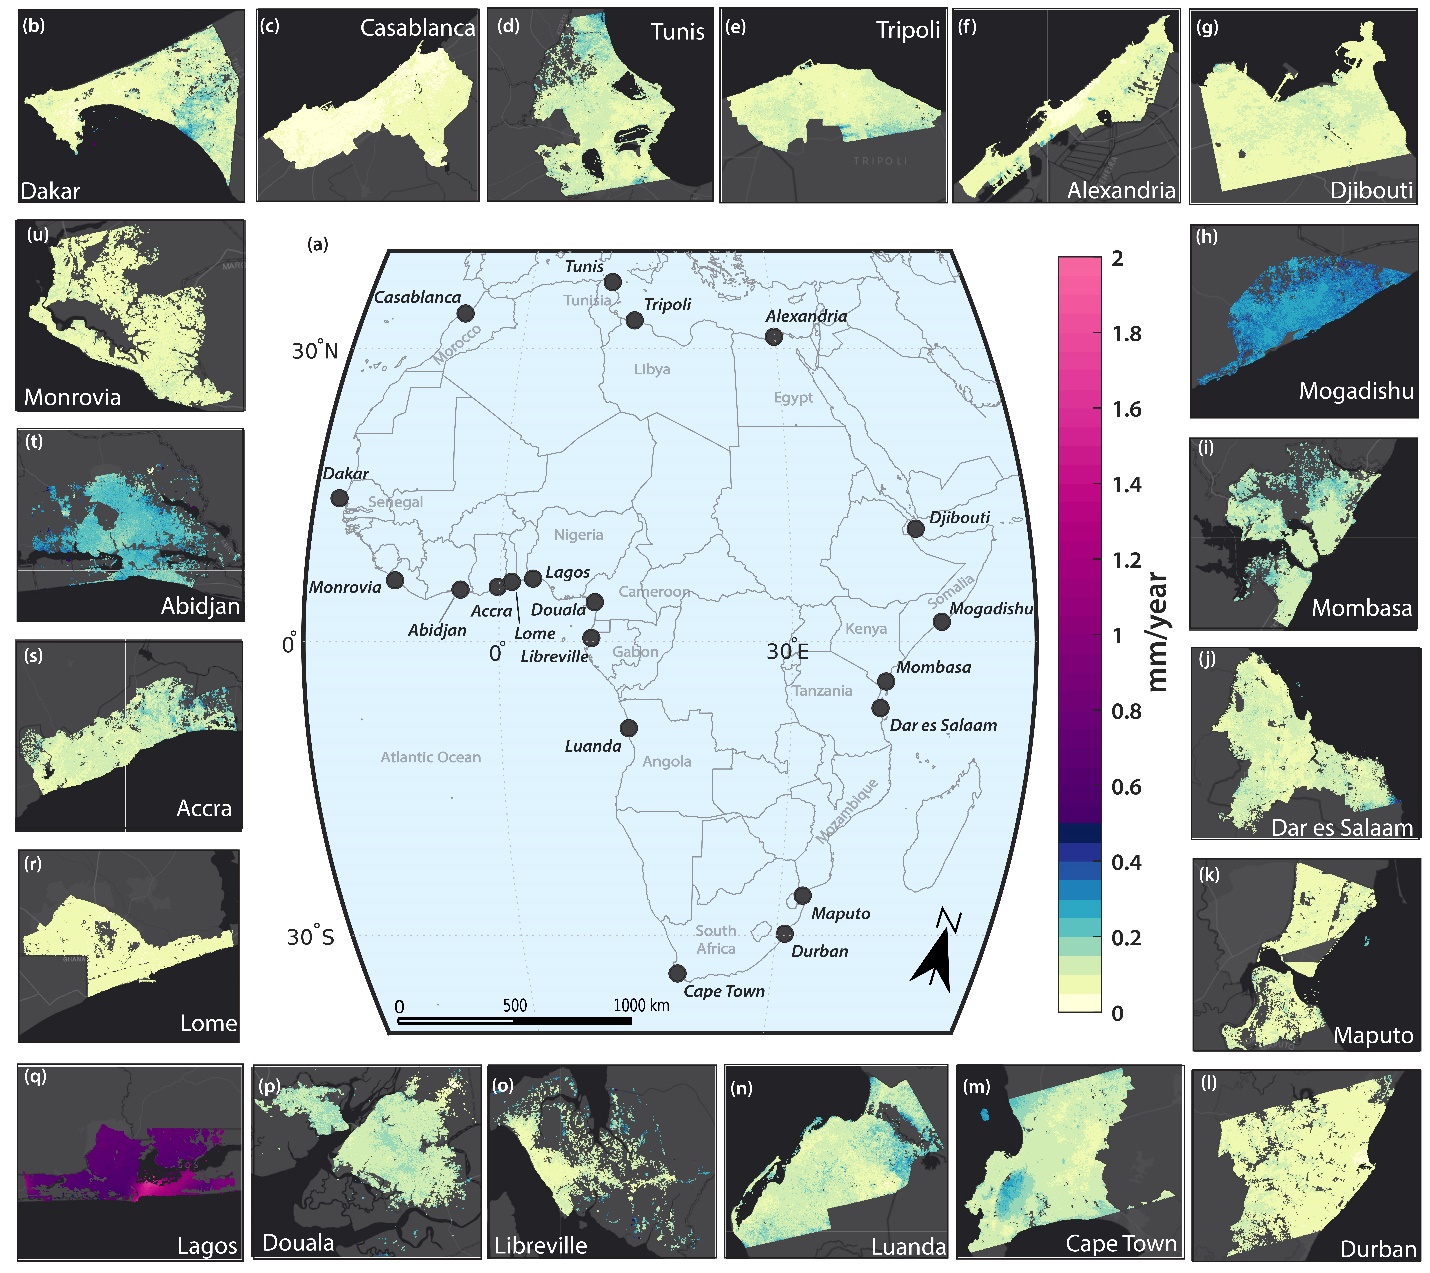
 Figure S1. Standard deviation of vertical land motion (VLM) estimates across 20 African coastal cities derived from InSAR data. Panel (a) presents the regional context map showing the geographic distribution of the study cities across Africa. Panels (b–u) display city-level maps of VLM standard deviation (in mm/year), capturing the spatial uncertainty in land motion estimates.


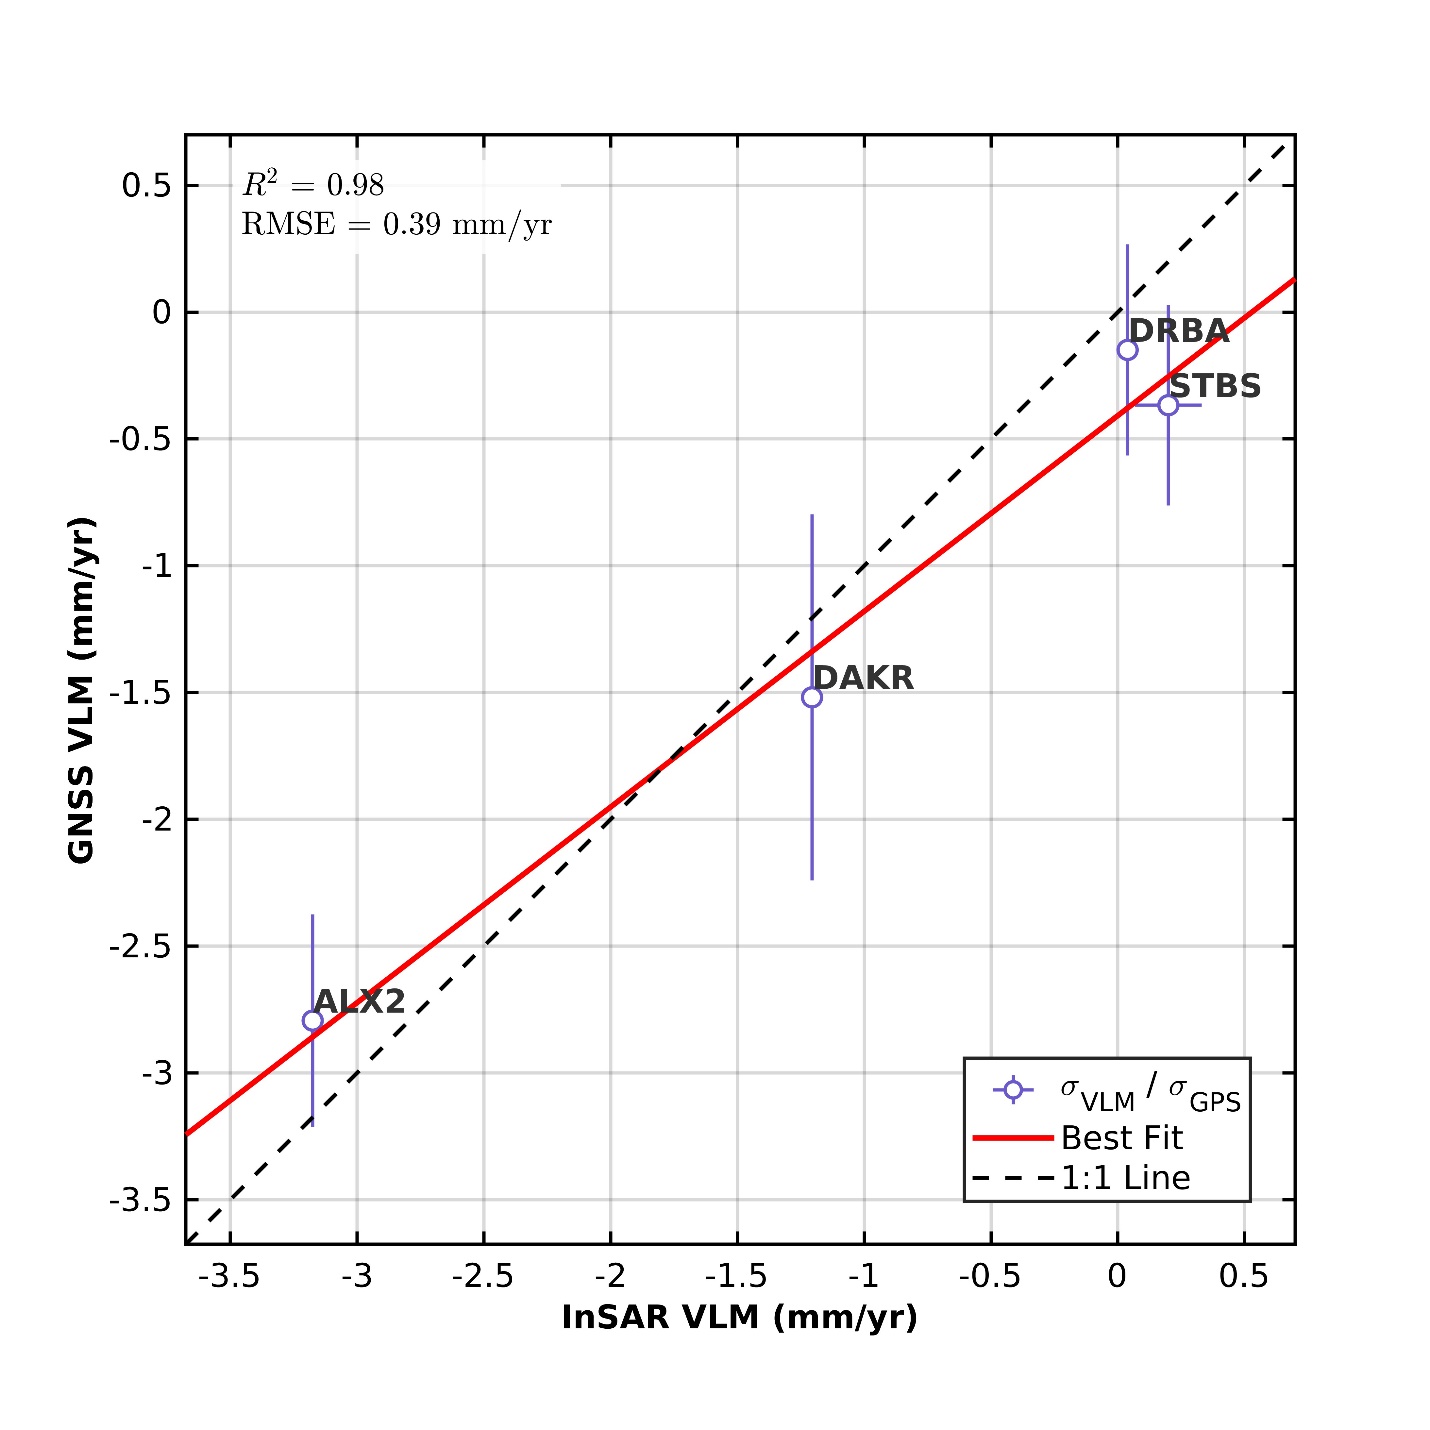


Figure S2: Bivariate comparison of GNSS and InSAR VLM rates. The dashed line indicates the 1:1 relationship, and the red line shows the best-fit regression (R² = 0.98, RMSE = 0.39 mm yr⁻¹). Error bars denote 1σ uncertainties, with GNSS station codes labeled at each point. GNSS rates are from the Nevada Geodetic Laboratory.

**
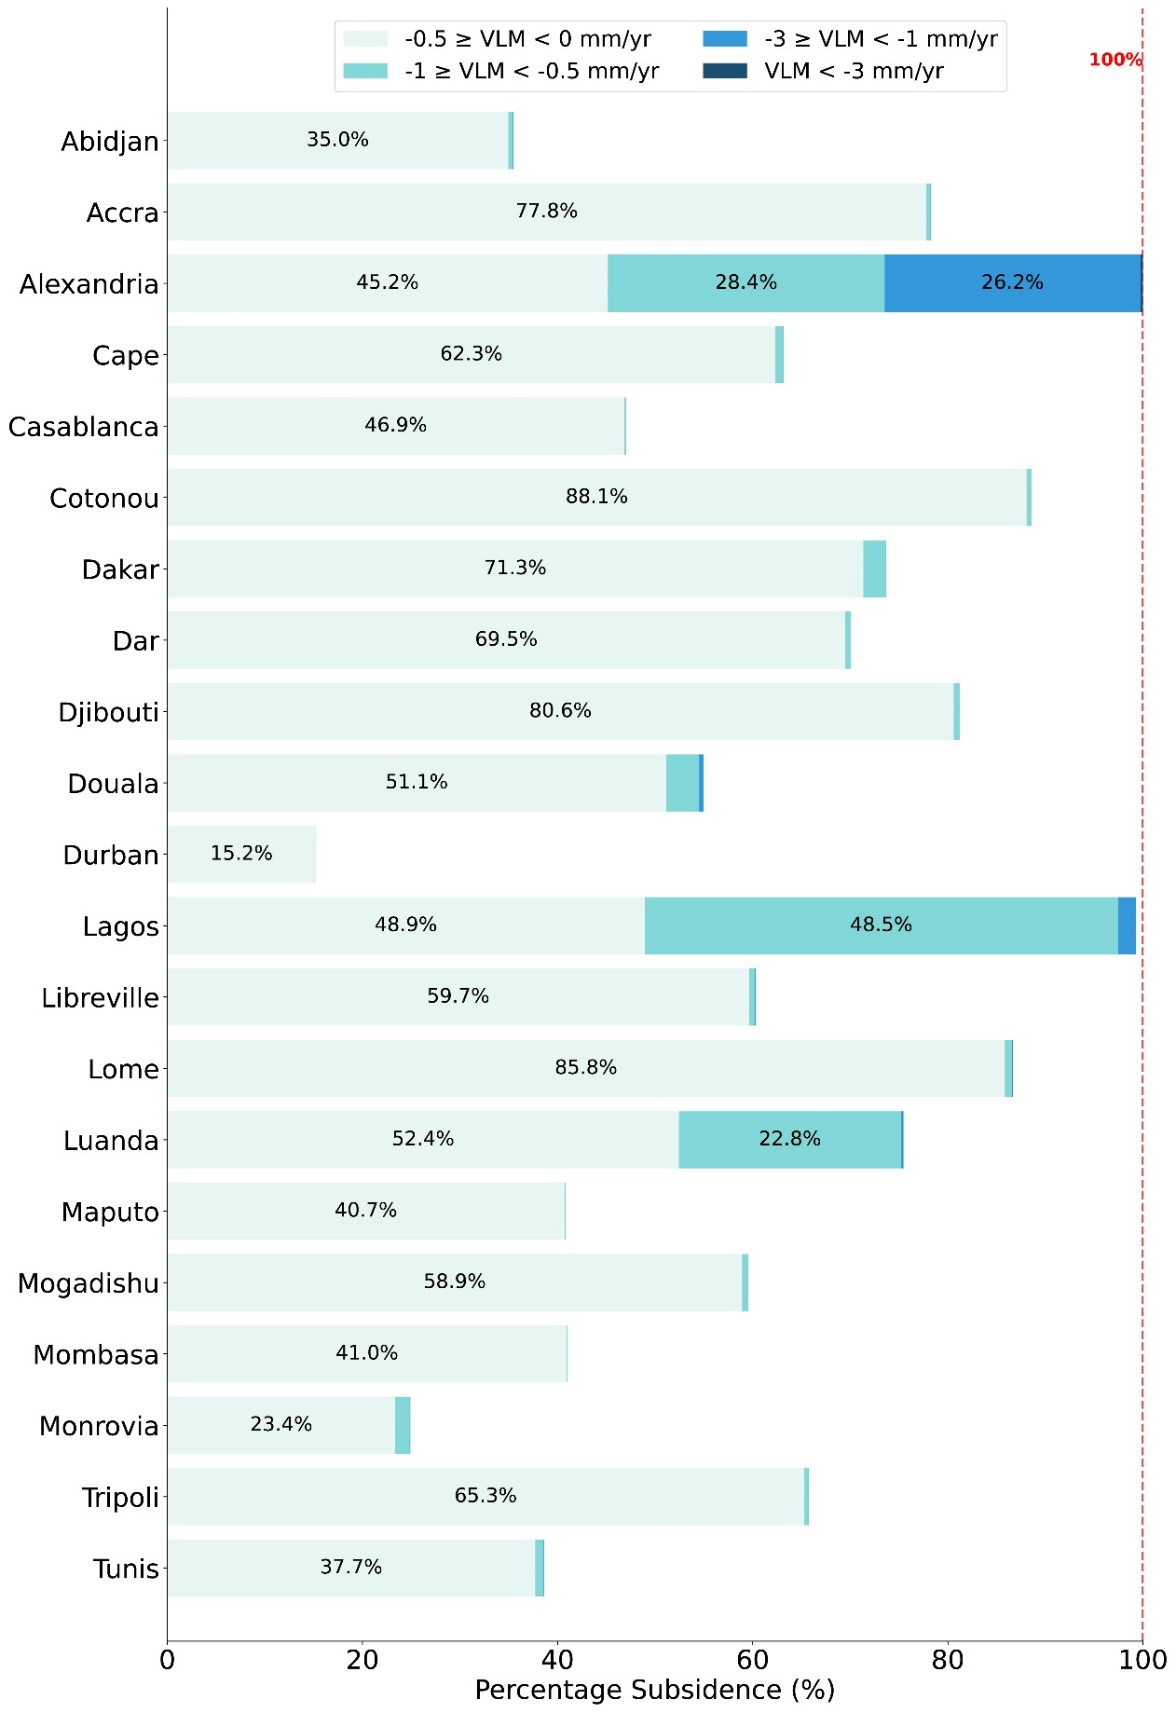
**

Figure S3: Distribution of subsiding land area across 20 African coastal cities based on VLM categories. The bar chart shows the percentage of each city's coastal land area experiencing different rates of land subsidence.


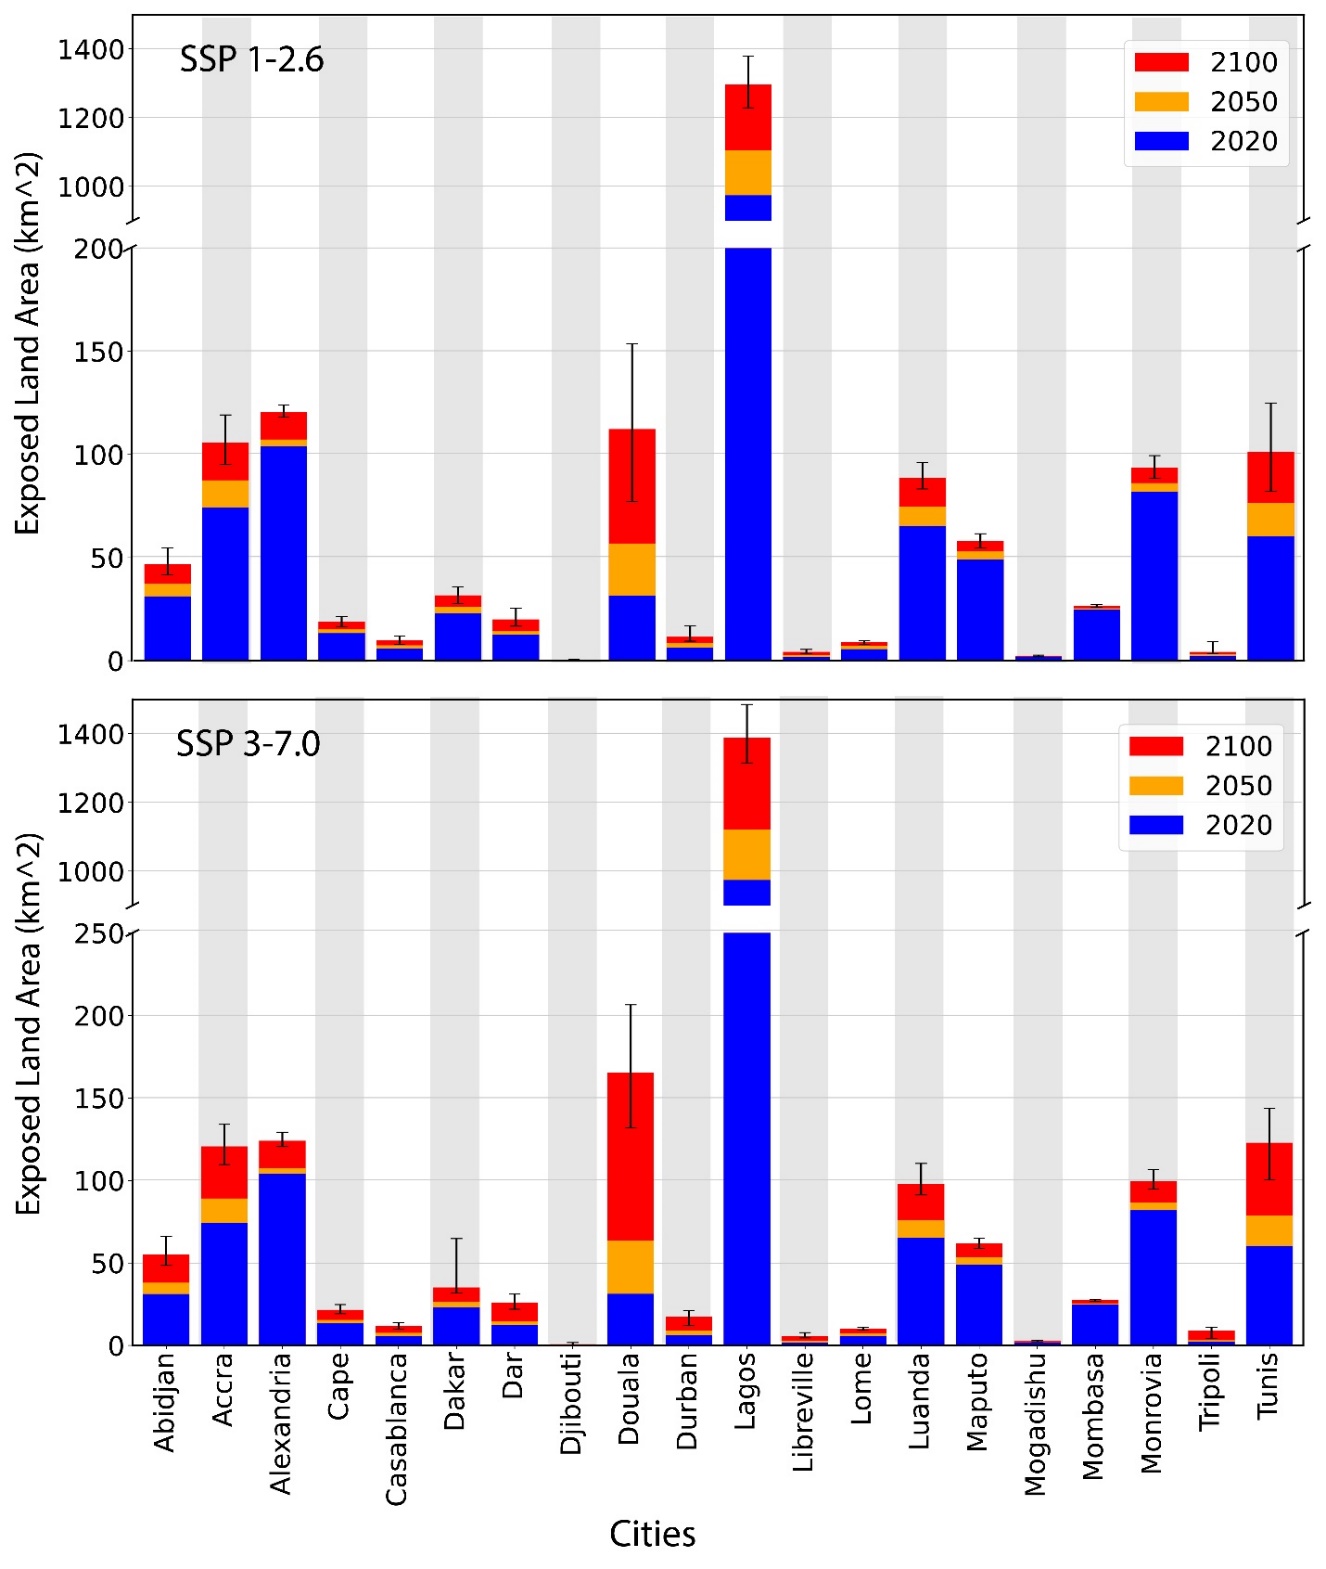


Figure S4: Projected exposed land area to coastal flooding across 20 African coastal cities under two climate scenarios (SSP1-2.6 and SSP3-7.0) for the years 2020, 2050, and 2100. The bar plots display the cumulative exposed land area (in km²) for each city, with results presented for three time horizons: 2020 (blue), 2050 (orange), and 2100 (red). The upper panel represents projections under the low-emissions scenario (SSP1-2.6), while the lower panel corresponds to the high-emissions scenario (SSP3-7.0). Error bars represent the uncertainty bounds derived from vertical land motion (VLM) variability and sea-level rise (SLR) model spread.

**Table S1.** Projected land area (in km²) exposed to coastal flooding in 20 African coastal cities under InSAR-VLM corrected SSP 1-2.6SLR scenario for the years 2020, 2050, and 2100.

|  | 2020 (sq. km) | | | | 2050 (sq. km) | | | | 2100 (sq. km) | | | |
| --- | --- | --- | --- | --- | --- | --- | --- | --- | --- | --- | --- | --- |
| Cities | Median | Lower Bound | Upper Bound | Median | | Lower Bound | Upper Bound | Median | | Lower Bound | Upper Bound |
| Abidjan | 31.18 | 27.35 | 35.03 | 37.22 | | 33.27 | 41.5 | 46.6965 | | 41.5719 | 54.7452 |
| Accra | 74.3 | 67.6 | 80.05 | 87.48 | | 76.12 | 95.42 | 105.8004 | | 95.2506 | 119.214 |
| Alexandria | 103.99 | 102.76 | 105.25 | 107.27 | | 105.84 | 116.51 | 120.4227 | | 117.9756 | 124.0704 |
| Cape | 13.35 | 11.55 | 14.91 | 15.18 | | 13.57 | 17.19 | 18.7722 | | 16.5222 | 21.3336 |
| Casablanca | 5.74 | 5.14 | 7.21 | 7.47 | | 5.84 | 8.66 | 9.7668 | | 7.9047 | 11.9061 |
| Dakar | 23.1 | 20.63 | 25.6 | 26.04 | | 23.42 | 28.59 | 31.6827 | | 27.6921 | 35.7777 |
| Dar | 12.59 | 11.6 | 14.02 | 14.28 | | 12.86 | 17.13 | 20.0268 | | 16.7598 | 25.5168 |
| Djibouti | 0.01 | 0 | 0.02 | 0.03 | | 0.01 | 0.06 | 0.18 | | 0.0666 | 0.738 |
| Douala | 31.56 | 19.33 | 47.18 | 56.84 | | 38.99 | 78.3 | 112.2993 | | 77.2506 | 153.7623 |
| Durban | 6.31 | 4.91 | 8.36 | 8.54 | | 6.77 | 10.19 | 11.5722 | | 9.4518 | 16.7886 |
| Lagos | 974.1 | 904.63 | 1037.48 | 1105.56 | | 1045.74 | 1170.53 | 1296.0612 | | 1228.7565 | 1379.4138 |
| Libreville | 1.71 | 0.96 | 2.28 | 2.71 | | 1.9 | 3.37 | 4.2723 | | 3.4857 | 5.4873 |
| Lome | 5.61 | 5.27 | 5.95 | 7.21 | | 5.97 | 7.76 | 8.901 | | 7.9623 | 9.7641 |
| Luanda | 65.29 | 61.07 | 70.38 | 74.59 | | 70.5 | 79.24 | 88.6365 | | 83.2923 | 96.1947 |
| Maputo | 48.99 | 45.67 | 52.13 | 52.93 | | 49.64 | 55.67 | 57.9285 | | 54.7605 | 61.5987 |
| Mogadishu | 1.76 | 1.56 | 1.97 | 1.9 | | 1.69 | 2.14 | 2.2428 | | 1.908 | 2.6919 |
| Mombasa | 24.7 | 24.2 | 25.12 | 25.41 | | 24.96 | 25.93 | 26.5266 | | 25.9326 | 27.2538 |
| Monrovia | 81.91 | 78.46 | 85.28 | 86.1 | | 82.6 | 90.17 | 93.5424 | | 88.4394 | 99.423 |
| Tripoli | 2.3 | 1.99 | 2.65 | 3.12 | | 2.31 | 3.84 | 4.2471 | | 3.3282 | 9.2547 |
| Tunis | 60.19 | 46.36 | 74.3 | 76.49 | | 61.11 | 92.59 | 101.3238 | | 82.0962 | 124.8237 |

**Table S2.** Projected land area (in km²) exposed to coastal flooding in 20 African coastal cities under InSAR-VLM corrected SSP 2-4.5SLR scenario for the years 2020, 2050, and 2100.

|  | 2020 (sq. km) | | | 2050 (sq. km) | | | 2100 (sq. km) | | |
| --- | --- | --- | --- | --- | --- | --- | --- | --- | --- |
| Cities | Median | Lower Bound | Upper Bound | Median | Lower Bound | Upper Bound | Median | Lower Bound | Upper Bound |
| Abidjan | 31.18 | 27.35 | 35.03 | 37.7 | 33.85 | 41.99 | 51.03 | 44.83 | 61.1 |
| Accra | 74.3 | 67.6 | 80.05 | 88.64 | 77.38 | 97.02 | 113.36 | 102.7 | 127.3 |
| Alexandria | 104.01 | 102.77 | 105.37 | 107.38 | 105.93 | 116.66 | 122.16 | 119.3 | 126.42 |
| Cape | 13.35 | 11.55 | 14.91 | 15.35 | 13.73 | 17.35 | 20.07 | 18 | 22.88 |
| Casablanca | 5.74 | 5.15 | 7.21 | 7.6 | 5.91 | 8.76 | 10.95 | 9 | 13.04 |
| Dakar | 23.1 | 20.63 | 25.6 | 26.23 | 23.59 | 28.81 | 33.46 | 30.22 | 61.98 |
| Dar | 12.6 | 11.61 | 14.04 | 14.45 | 13 | 17.36 | 24.19 | 17.92 | 27.72 |
| Djibouti | 0.01 | 0 | 0.02 | 0.03 | 0.01 | 0.06 | 0.48 | 0.12 | 1.3 |
| Douala | 31.56 | 19.35 | 47.16 | 60.28 | 44.17 | 82.9 | 138.86 | 103.46 | 182.84 |
| Durban | 6.32 | 4.92 | 8.39 | 8.76 | 6.94 | 10.38 | 12.83 | 10.76 | 19.38 |
| Lagos | 974.1 | 904.61 | 1037.44 | 1115.02 | 1054.17 | 1178.12 | 1339.31 | 1270.47 | 1438.26 |
| Libreville | 1.71 | 0.96 | 2.29 | 2.81 | 1.96 | 3.47 | 4.98 | 4.03 | 6.63 |
| Lome | 5.61 | 5.27 | 5.95 | 7.3 | 6.03 | 7.83 | 9.43 | 8.71 | 10.5 |
| Luanda | 65.29 | 61.07 | 70.39 | 75.33 | 71.07 | 79.97 | 92.86 | 86.91 | 103.53 |
| Maputo | 49.07 | 45.75 | 52.19 | 53.33 | 50.11 | 55.98 | 59.72 | 56.91 | 63.48 |
| Mogadishu | 1.77 | 1.57 | 1.98 | 1.92 | 1.71 | 2.17 | 2.41 | 2.01 | 2.91 |
| Mombasa | 24.72 | 24.21 | 25.13 | 25.49 | 25.03 | 26.01 | 26.97 | 26.36 | 27.69 |
| Monrovia | 81.91 | 78.46 | 85.27 | 86.53 | 83.01 | 90.57 | 97.06 | 91.93 | 103.27 |
| Tripoli | 2.3 | 1.99 | 2.65 | 3.17 | 2.34 | 3.88 | 4.9 | 3.82 | 10.16 |
| Tunis | 60.3 | 46.47 | 74.32 | 77.77 | 62.36 | 93.92 | 113.86 | 92.18 | 135.72 |

**Table S3.** Projected land area (in km²) exposed to coastal flooding in 20 African coastal cities under InSAR-VLM corrected SSP 3-7.0SLR scenario for the years 2020, 2050, and 2100.

|  | 2020 (sq. km) | | | 2050 (sq. km) | | | 2100 (sq. km) | | |
| --- | --- | --- | --- | --- | --- | --- | --- | --- | --- |
| Cities | Median | Lower Bound | Upper Bound | Median | Lower Bound | Upper Bound | Median | Lower Bound | Upper Bound |
| Abidjan | 31.18 | 27.36 | 35.03 | 38.04 | 34.12 | 42.3 | 55.24 | 48.49 | 66.21 |
| Accra | 74.3 | 67.61 | 80.04 | 89.07 | 77.84 | 97.71 | 120.64 | 109.61 | 133.97 |
| Alexandria | 103.98 | 102.75 | 105.25 | 107.49 | 106.02 | 116.85 | 124.06 | 120.53 | 129.25 |
| Cape | 13.35 | 11.55 | 14.9 | 15.47 | 13.87 | 17.48 | 21.57 | 19.25 | 24.8 |
| Casablanca | 5.73 | 5.13 | 7.2 | 7.63 | 6.5 | 8.8 | 11.86 | 10.01 | 14 |
| Dakar | 23.13 | 20.66 | 25.63 | 26.33 | 23.72 | 28.92 | 35.14 | 31.79 | 64.76 |
| Dar | 12.59 | 11.61 | 14.01 | 14.5 | 13.04 | 17.52 | 26.05 | 21.97 | 31.09 |
| Djibouti | 0.01 | 0 | 0.02 | 0.03 | 0.01 | 0.07 | 0.81 | 0.28 | 1.8 |
| Douala | 31.25 | 19.04 | 46.66 | 63.72 | 46.49 | 85.88 | 165.14 | 131.9 | 206.48 |
| Durban | 6.31 | 4.9 | 8.36 | 8.84 | 7.02 | 10.48 | 17.58 | 12.03 | 21.14 |
| Lagos | 974.1 | 904.66 | 1037.4 | 1120.9 | 1060.3 | 1182.88 | 1387.74 | 1314.77 | 1485.08 |
| Libreville | 1.71 | 0.96 | 2.28 | 2.88 | 1.99 | 3.52 | 5.7 | 4.62 | 7.83 |
| Lome | 5.61 | 5.27 | 5.95 | 7.36 | 6.06 | 7.87 | 9.94 | 9.22 | 11.09 |
| Luanda | 65.25 | 61.01 | 70.3 | 75.81 | 71.69 | 80.51 | 97.88 | 91.23 | 110.32 |
| Maputo | 48.99 | 45.67 | 52.13 | 53.55 | 50.35 | 56.18 | 61.93 | 58.83 | 65.16 |
| Mogadishu | 1.77 | 1.57 | 1.98 | 1.93 | 1.72 | 2.18 | 2.65 | 2.23 | 3.18 |
| Mombasa | 24.72 | 24.21 | 25.12 | 25.53 | 25.06 | 26.04 | 27.38 | 26.8 | 28.09 |
| Monrovia | 81.91 | 78.46 | 85.28 | 86.73 | 83.3 | 90.78 | 99.57 | 94.69 | 106.6 |
| Tripoli | 2.29 | 1.98 | 2.64 | 3.19 | 2.36 | 3.91 | 9.1 | 4.23 | 10.88 |
| Tunis | 60.05 | 46.23 | 74.14 | 78.58 | 63.08 | 94.74 | 122.83 | 100.43 | 143.78 |

Table S4: Synthetic Aperture Radar (SAR) Datasets for African Cities. The processed path and frame numbers for each city is indicated here. For the 20 cities, we processed multiple frames.

| **Cities** | **Path** | **Frame** | **No. of images** | **Start Date (yyyymmdd)** | **End Date (yyyymmdd)** |
| --- | --- | --- | --- | --- | --- |
| Abidjan | 118 | 1197 | 289 | 20160926 | 20230429 |
| Accra | 145 | 1198 | 302 | 20170601 | 20230501 |
| Alexandria | 131 | 99 | 204 | 20160927 | 20230406 |
| Cape Town | 131 | 1063 -1067 | 254 | 20150331 | 20230605 |
| Casablanca | 45 | 103 | 337 | 20161003 | 20230611 |
| Dakar | 133 | 40 | 142 | 20171010 | 20230605 |
| Dar es Salaam | 57/6 | 1155 - 1157 | 191 | 20141021 | 20220430 |
| Djibouti | 116 | 32-35,1217 | 197 | 20141025 | 20230523 |
| Douala | 132 | 1192 | 192 | 20170212 | 20230617 |
| Durban | 43 | 1077 | 228 | 20150325 | 20230623 |
| Libreville | 29 | 1180 | 191 | 20170205 | 20230622 |
| Lome | 74 | 1199 | 367 | 20150327 | 20230508 |
| Luanda | 131 | 1148 | 159 | 20160430 | 20211218 |
| Maputo | 72 | 1095 | 219 | 20151122 | 20230613 |
| Mogadishu | 116 | 2/1186 | 145 | 20141224 | 20211217 |
| Mombasa | 159 | 1163 | 195 | 20151222 | 20230408 |
| Monrovia | 162 | 1200 | 240 | 20150414 | 20230607 |
| Tripoli | 15 | 103 | 163 | 20171119 | 20230329 |
| Tunis | 88 | 118 | 168 | 20141023 | 20211215 |
